# Supplementary material for: Upregulation of CYP1B1 by hypoxia is mediated by ERα activation in breast cancer cells
Source: Research Square preprint supplement (doi:10.21203/rs.3.rs-1319305/v1), 2022-02-04
Supplement: Supplementary file 1 [file 69c3d335b5dcff934c73311d.docx]

**Supplementary Information**

**Upregulation of CYP1B1 by hypoxia is mediated by ERα activation in breast cancer cells**

Jin Young Min a,b,1, Gi Ho Lee b,1, Tilak Khanal b, Sun Woo Jin b, Sang-Yeop Lee b, Hyung Gyun Kim c, Ju-Yong Hyon a,Young-Ho Chung a,d, Sang Keun Ha e,f, Eun Hee Han a,*, Hye Gwang Jeong b,*

a Research Center for Bioconvergence Analysis, Korea Basic Science Institute (KBSI), Cheongju 28119, South Korea

b Department of Toxicology, **College of Pharmacy, Chungnam National** University, Daejeon 34133, South Korea

c Department Research Planning Team, Mokpo Marine Food-industry Research Center, Mokpo 58621, South Korea

d Graduate School of Analytical Science and Technology (GRAST), Chungnam National University, Daejeon 34134, South Korea

e Research Division of Food Functionality, Korea Food Research Institute (KFRI), Jeollabuk-do 55365, South Korea

f Division of Food Biotechnology, University of Science and Technology, Daejeon 34113, South Korea

1 Contributed equally to this work.

*Correspondence:

Eun Hee Han

Research Center for Bioconvergence Analysis, Korea Basic Science Institute, 162, Yeongudanji-ro, Ochang-eup, Cheongwon-gu, Cheongju-si, Chungbuk, 28119, South Korea

Tel: +82-43-240-5423

Fax: +82-43-240-5158

E-mail: [heh4285@kbsi.re.kr](mailto:heh4285@kbsi.re.kr)

Hye Gwang Jeong

Department of Toxicology, College of Pharmacy, Chungnam National University, 220 Gung-dong, Yuseong-Gu, Daejeon 34134, South Korea

Tel: +82-42-821-5936

Fax: +82-42-825-4946

E-mail: [hgjeong@cnu.ac.kr](mailto:hgjeong@cnu.ac.kr).

**Supplementary Figure Legends**

**Supple Fig. 1.** Image of a tissue microarray (TMA) containing 110 breast tissue cores. (A) Schematic diagram of tumor stages of each breast tissue core. (B) H&E staining images provided by the manufacturer. Immunofluorescence images of TMA stained with anti-HIF-1α (C) and anti-CYP1B1 (D) antibodies. Images were acquired at 20X magnification using a Leica Thunder microscope. Whole tissue slide images were mosaic merged via LAS-X software. (E) Violin plots of fluorescence intensities of HIF-1α and CYP1B1. Samples were classified into low (IHC score: 1+, 2+) and high (IHC score: 3+) groups according to the ER expression status of the TMA specification sheet, and the correlation between HIF-1α and CYP1B1 expression was analyzed. *, *p* < 0.01 versus ER-positive breast tumors with low ER status by Mann–Whitney test. ns, not significant.

**Supple Fig. 2.** Correlation analysis of mRNA levels of HIF1a and CYP1B1 in the open dataset of transcripts from ER-positive breast cancer patients in the cBioPortal database. In the brca_metabric (A), brca_tcga_pub2015 (B), brca_tcga (C) datasets, breast cancer patients were classified for the top/bottom 25% of HIF1a expression among patients with ER-positive breast cancer. mRNA levels of CYP1B1 were analyzed and presented as violin plots. In the brca_tcga_pub2015 and brca_tcga datasets, mRNA levels were Log2-transformed. *, *p* < 0.0001 versus ER-positive tumor tissue with low HIF-1α expression by Mann–Whitney test.

**Supple Fig. 3.** Enrichment plot and associated gene heatmap for tumor recurrence in the ER/HIF1a/CYP1B1 high group in the human transcriptome public dataset (cBioPortal study ID: brca_metabric). (A) Recurrent tumor enrichment plot of ER high profile with high expression of HIF-1α/CYP1B1. (B) Heat map of genes (22 genes in core enrichment) corresponding to recurrent tumor analysis. Red and blue indicate upregulated and downregulated gene levels (Z-scores).

**Supple Fig. 4.** Correlation analysis of cancer recurrence and mortality in the public transcriptome analysis dataset (brca_tcga_pub2015 and brca_tcga) of ER-positive breast cancer patients. Scatterplots of the correlation between the mRNA expression of HIF-1α and CYP1B1 in ER-positive breast cancer patients who have relapsed (A) or died (B). The number of patients in each group, correlation coefficient, and *p*-values are displayed on each chart.

**Supplementary Table**

**Supple Table. 1.** Clinical characteristics of the breast tissue cores in the TMA.

| Feature | Subgroup | Counts of sample | |
| --- | --- | --- | --- |
| ER-negative  (non-measurable* ) | ER-positive |
| Type | NAT | 4 (4*) | 6 |
| Malignant | 36 (2*) | 64 |
| TNM | - | 4 | 6 |
| T1N0M0 | 2 | 5 |
| T1N1M0 | 1 | 1 |
| T2N0M0 | 15 | 27 |
| T2N1M0 | 8 | 11 |
| T2N2M0 | 1 | 3 |
| T3N0M0 | 2 | 6 |
| T3N1M0 | 3 | 3 |
| T3N2M0 | 0 | 2 |
| T4N0M0 | 1 | 3 |
| T4N1M0 | 1 | 1 |
| T4N2M0 | 2 | 2 |
| Grade | - | 3 | 6 |
| * | 2 | 1 |
| 1~2 | 0 | 1 |
| 2 | 18 | 47 |
| 2~3 | 1 | 1 |
| 3 | 16 | 14 |
| Stage | - | 4 | 6 |
| IA | 2 | 5 |
| IIA | 16 | 28 |
| IIB | 10 | 17 |
| IIIA | 4 | 8 |
| IIIB | 4 | 6 |

* Measurement not possible

**Supple Table. 2.** Immunofluorescence staining intensities in ER-positive breast cancer tissue cores in the tissue microarray.

| **No.** | **Position** | **Tissue ID.** | **Fluorescence intensity** | | |
| --- | --- | --- | --- | --- | --- |
| **ER** | **HIF-1α** | **CYP1B1** |
| 1 | A2 | Fmg010622 | ++ | 42.003 | 37.252 |
| 2 | A3 | Fmg040237 | +++ | 53.988 | 88.394 |
| 3 | A5 | Fmg100001 | +++ | 38.83 | 34.435 |
| 4 | A6 | Fmg010733 | +++ | 44.473 | 49.318 |
| 5 | A7 | Fmg120154 | + | 49.106 | 45.741 |
| 6 | A9 | Fmg020090 | +++ | 48.433 | 41.056 |
| 7 | B2 | Fmg020179 | +++ | 43.942 | 45.852 |
| 8 | B3 | Fmg030639 | +++ | 47.931 | 43.768 |
| 9 | B4 | Fmg020081 | +++ | 41.777 | 41.072 |
| 10 | B5 | Fmg020082 | +++ | 63.692 | 54.442 |
| 11 | B6 | Fmg100066 | +++ | 41.71 | 34.585 |
| 12 | B8 | Fmg020190 | +++ | 54.115 | 53.868 |
| 13 | B9 | Fmg040118 | +++ | 51.144 | 40.27 |
| 14 | B10 | Fmg140037 | +++ | 60.467 | 107.167 |
| 15 | C1 | Fmg020770 | + | 44.861 | 63.264 |
| 16 | C2 | Fmg010624 | +++ | 45.26 | 47.263 |
| 17 | C3 | Fmg040104 | +++ | 57.682 | 54.486 |
| 18 | C4 | Fmg040001 | +++ | 46.88 | 39.387 |
| 19 | C5 | Fmg110044 | +++ | 54.698 | 45.156 |
| 20 | C6 | Fmg130073 | +++ | 46.297 | 46.999 |
| 21 | C7 | Fmg030482 | +++ | 55.627 | 47.424 |
| 22 | C8 | Fmg030496 | +++ | 53.857 | 58.036 |
| 23 | C9 | Fmg030501 | + | 52.72 | 41.88 |
| 24 | D1 | Fmg130041 | +++ | 55.627 | 49.057 |
| 25 | D2 | Fmg030645 | +++ | 46.295 | 42.64 |
| 26 | D3 | Fmg100050 | +++ | 65.07 | 57.144 |
| 27 | D4 | Fmg040661 | + | 43.738 | 49.644 |
| 28 | D5 | Fmg040074 | +++ | 51.844 | 44.496 |
| 29 | D6 | Fmg010735 | +++ | 67.698 | 52.79 |
| 30 | D10 | Fmg040048 | +++ | 49.801 | 54.317 |
| 31 | E1 | Fmg010671 | +++ | 68.05 | 60.504 |
| 32 | E2 | Fmg040768 | + | 50.125 | 51.819 |
| 33 | E3 | Fmg010531 | ++ | 56.683 | 41.655 |
| 34 | E4 | Fmg030523 | +++ | 47.133 | 36.148 |
| 35 | E8 | Fmg010358 | + | 49.404 | 47.024 |
| 36 | E9 | Fmg050026 | +++ | 52.998 | 72.101 |
| 37 | F1 | Fmg010536 | +++ | 66.004 | 55.626 |
| 38 | F2 | Fmg010643 | + | 47.643 | 43.431 |
| 39 | F3 | Fmg030516 | +++ | 60.422 | 61.298 |
| 40 | F5 | Fmg040082 | + | 42.98 | 42.46 |
| 41 | F8 | Fmg040675 | +++ | 48.59 | 50.035 |
| 42 | F9 | Fmg040125 | +++ | 47.259 | 52.995 |
| 43 | G1 | Fmg100010 | ++ | 30.781 | 40.244 |
| 44 | G2 | Fmg010492 | ++ | 47.593 | 43.128 |
| 45 | G4 | Fmg010540 | +++ | 53.032 | 46.804 |
| 46 | G5 | Fmg040132 | + | 47.925 | 57.278 |
| 47 | G6 | Fmg100103 | ++ | 68.085 | 50.821 |
| 48 | G7 | Fmg020026 | + | 41.747 | 39.227 |
| 49 | G10 | Fmg010729 | +++ | 53.945 | 53.975 |
| 50 | H1 | Fmg010642 | ++ | 33.24 | 56.036 |
| 51 | H2 | Fmg010943 | ++ | 39.537 | 29.763 |
| 52 | H4 | Fmg080090 | +++ | 61.95 | 81.873 |
| 53 | H5 | Fmg100104 | + | 49.621 | 50.133 |
| 54 | H6 | Fmg020035 | ++ | 29.619 | 38.312 |
| 55 | H7 | Fmg020765 | + | 50.783 | 51.397 |
| 56 | H10 | Fmg030528 | +++ | 43.665 | 37.322 |
| 57 | I1 | Fmg040182 | +++ | 49.217 | 96.131 |
| 58 | I5 | Fmg120001 | +++ | 80.681 | 130.405 |
| 59 | I7 | Fmg020038 | +++ | 61.811 | 99.058 |
| 60 | I9 | Fmg020443 | +++ | 47.161 | 53.287 |
| 61 | J1 | Fmg100067 | +++ | 79.531 | 59.749 |
| 62 | J5 | Fmg010755 | + | 66.086 | 62.766 |
| 63 | J7 | Fmg030432 | +++ | 76.274 | 63.891 |
| 64 | J10 | Fmg040344 | ++ | 45.781 | 99.132 |

**Supple Table. 3.** Immunofluorescence staining intensities in ER-negative breast cancer tissue cores in the tissue microarray.

| **No.** | **Position** | **Tissue ID.** | **Fluorescence intensity** | | |
| --- | --- | --- | --- | --- | --- |
| **ER** | **HIF-1α** | **CYP1B1** |
| 1 | A1 | Fmg020761 | - | 49.173 | 68.875 |
| 2 | A4 | Fmg130003 | - | 45.386 | 35.494 |
| 3 | A8 | Fmg020031 | - | 51.101 | 28.701 |
| 4 | A10 | Fmg020037 | - | 50.717 | 47.772 |
| 5 | B1 | Fmg080098 | - | 38.038 | 54.968 |
| 6 | B7 | Fmg080091 | - | 39.382 | 41.677 |
| 7 | C10 | Fmg010613 | - | 51.082 | 45.919 |
| 8 | D7 | Fmg010310 | - | 43.257 | 30.765 |
| 9 | D8 | Fmg090029 | - | 43.769 | 32.998 |
| 10 | D9 | Fmg050032 | - | 47.679 | 43.627 |
| 11 | E5 | Fmg060191 | - | 57.967 | 49.919 |
| 12 | E6 | Fmg010612 | - | 75.343 | 71.005 |
| 13 | E7 | Fmg030477 | - | 87.013 | 88.3 |
| 14 | E10 | Fmg010604 | - | 45.847 | 37.19 |
| 15 | F4 | Fmg060181 | - | 50.239 | 45.892 |
| 16 | F6 | Fmg020184 | - | 59.237 | 40.452 |
| 17 | F7 | Fmg020562 | - | 58.321 | 38.725 |
| 18 | F10 | Fmg020028 | - | 49.077 | 36.769 |
| 19 | G3 | Fmg080055 | - | 58.817 | 59.045 |
| 20 | G8 | Fmg010767 | * | 51.757 | 33.802 |
| 21 | G9 | Fmg140019 | - | 78.229 | 75.379 |
| 22 | H3 | Fmg010547 | - | 51.08 | 73.411 |
| 23 | H8 | Fmg030512 | * | 48.59 | 50.035 |
| 24 | H9 | Fmg050004 | - | 49.738 | 40.934 |
| 25 | I2 | Fmg030520 | - | 38.076 | 89.016 |
| 26 | I3 | Fmg130067 | - | 43.532 | 77.659 |
| 27 | I4 | Fmg040162 | - | 40.397 | 51.021 |
| 28 | I6 | Fmg110075 | - | 44.696 | 56.791 |
| 29 | I8 | Fmg080106 | - | 61.073 | 84.497 |
| 30 | I10 | Fmg110115 | - | 59.771 | 85.638 |
| 31 | J2 | Fmg030644 | - | 67.28 | 59.883 |
| 32 | J3 | Fmg110037 | - | 59.521 | 60.27 |
| 33 | J4 | Fmg100037 | - | 65.868 | 55.786 |
| 34 | J6 | Fmg080053 | - | 80.665 | 68.146 |
| 35 | J8 | Fmg090030 | - | 80.725 | 73.647 |
| 36 | J9 | Fmg021845 | - | 68.593 | 55.872 |

* Measurement not possible

**Supple Table. 4.** Top 10 enriched gene set of ER/HIF1α-CYP1B1 triple high group

| **GO** | **Description** | **Number of gene** | | | **% of**  **match** | **STDV**  **of %** | **Log10(*q*)** |
| --- | --- | --- | --- | --- | --- | --- | --- |
| **input** | **GO list** | **matched** |
| C0025286 | Meningioma | 304 | 634 | 43 | 14 | 2 | -19 |
| C0521158 | Recurrent tumor | 304 | 735 | 43 | 14 | 2 | -16 |
| C0278510 | Childhood Medulloblastoma | 304 | 771 | 39 | 13 | 1.9 | -12 |
| C0555198 | Malignant Glioma | 304 | 724 | 38 | 12 | 1.9 | -13 |
| C0278876 | Adult Medulloblastoma | 304 | 762 | 38 | 12 | 1.9 | -12 |
| C4086152 | Childhood Astrocytoma | 304 | 615 | 36 | 12 | 1.9 | -13 |
| C0030297 | Pancreatic Neoplasm | 304 | 764 | 36 | 12 | 1.9 | -10 |
| C0007138 | Carcinoma, Transitional Cell | 304 | 623 | 32 | 11 | 1.8 | -10 |
| C0007124 | Noninfiltrating Intraductal Carcinoma | 304 | 486 | 30 | 9.9 | 1.7 | -11 |
| C3469521 | FANCONI ANEMIA, COMPLEMENTATION GROUP A (disorder) | 304 | 359 | 25 | 8.2 | 1.6 | -10 |

**Supple Table. 5.** Gene lists of gene set enrichment analysis (GSEA) (Recurrent Tumor).

| **No.** | **SYMBOL** | **RANK METRIC SCORE** | **RUNNING ES** | **CORE ENRICHMENT** |
| --- | --- | --- | --- | --- |
| 1 | FOXM1 | 1.385 | 0.0276 | Yes |
| 2 | AURKB | 1.336 | 0.0615 | Yes |
| 3 | CEP55 | 1.296 | 0.0904 | Yes |
| 4 | CENPE | 1.233 | 0.0984 | Yes |
| 5 | TIMELESS | 1.14 | 0.0655 | Yes |
| 6 | CDK1 | 1.133 | 0.0936 | Yes |
| 7 | FAM83D | 1.079 | 0.0896 | Yes |
| 8 | KIF20A | 1.061 | 0.1119 | Yes |
| 9 | CCNB1 | 1.055 | 0.1378 | Yes |
| 10 | MCM2 | 1.014 | 0.1473 | Yes |
| 11 | CDC25C | 1.005 | 0.1718 | Yes |
| 12 | FANCD2 | 0.984 | 0.1843 | Yes |
| 13 | CENPF | 0.972 | 0.2041 | Yes |
| 14 | CDKN3 | 0.959 | 0.2273 | Yes |
| 15 | MCM7 | 0.953 | 0.2427 | Yes |
| 16 | PCLAF | 0.932 | 0.246 | Yes |
| 17 | BIRC5 | 0.906 | 0.2639 | Yes |
| 18 | AURKA | 0.884 | 0.2698 | Yes |
| 19 | NEK2 | 0.851 | 0.2784 | Yes |
| 20 | TOP2A | 0.823 | 0.2902 | Yes |
| 21 | STMN1 | 0.822 | 0.3134 | Yes |
| 22 | TYMS | 0.761 | 0.3196 | Yes |
| 23 | HSPB1 | 0.632 | 0.2914 | No |
| 24 | CLDN7 | 0.579 | 0.2809 | No |
| 25 | NME1 | 0.555 | 0.2851 | No |
| 26 | PTGS2 | -0.517 | 0.2231 | No |
| 27 | IGF1 | -0.527 | 0.215 | No |
| 28 | MT1M | -0.535 | 0.2262 | No |
| 29 | SLIT2 | -0.539 | 0.2338 | No |
| 30 | CPE | -0.542 | 0.2414 | No |
| 31 | TGFB3 | -0.546 | 0.2377 | No |
| 32 | CXCL12 | -0.56 | 0.2152 | No |
| 33 | CD34 | -0.564 | 0.2234 | No |
| 34 | TRIM29 | -0.576 | 0.209 | No |
| 35 | PPARG | -0.585 | 0.2064 | No |
| 36 | CAV1 | -0.623 | 0.1665 | No |
| 37 | ETS2 | -0.653 | 0.1352 | No |
| 38 | TP63 | -0.658 | 0.1422 | No |
| 39 | IL33 | -0.662 | 0.1494 | No |
| 40 | CX3CR1 | -0.673 | 0.1378 | No |
| 41 | ID1 | -0.711 | 0.1042 | No |
| 42 | KRT5 | -0.768 | 0.0569 | No |
| 43 | PROS1 | -0.834 | 0.0307 | No |
